# Supplementary material
Source: Research Square preprint supplement (doi:10.21203/rs.3.rs-9223906/v1)
Supplement: Supplementary file 1 [file 978aeb77b18578355289ecd7.docx]

|  | ***Bos taurus*** | | | ***Capra hircus*** | | | ***Ovis aries*** | | | **Caprinae** | | | ***Sus* sp.** | | | ***Equus* sp.** | | | ***Canis* sp.** | | |
| --- | --- | --- | --- | --- | --- | --- | --- | --- | --- | --- | --- | --- | --- | --- | --- | --- | --- | --- | --- | --- | --- |
|  | **NR** | **MNE** | **MNI** | **NR** | **MNE** | **MNI** | **NR** | **MNE** | **MNI** | **NR** | **MNE** | **MNI** | **NR** | **MNE** | **MNI** | **NR** | **MNE** | **MNI** | **NR** | **MNE** | **MNI** |
| Skull + horn | 24 | 10 |  |  |  |  |  |  |  | 22 | 14 |  | 7 | 7 |  | 1 | 1 |  |  |  |  |
| Antler |  |  |  |  |  |  |  |  |  |  |  |  |  |  |  |  |  |  |  |  |  |
| Mandible | 33 | 18 |  | 22 | 22 |  | 28 | 24 |  | 62 | 41 |  | 38 | 29 |  | 4 | 4 |  | 1 | 1 |  |
| Maxilla | 10 | 9 |  |  |  |  |  |  |  | 25 | 22 |  | 8 | 7 |  | 1 | 1 |  |  |  |  |
| Tooth | 83 | 83 |  | 7 | 7 |  | 4 | 4 |  | 224 | 224 |  | 129 | 126 |  | 15 | 15 |  |  |  |  |
| Maxilla tooth |  |  |  |  |  |  |  |  |  |  |  |  |  |  |  |  |  |  |  |  |  |
| CRANIAL TOTAL | 150 | 120 |  | 29 | 29 |  | 32 | 28 |  | 333 | 301 |  | 182 | 169 |  | 21 | 21 |  | 1 | 1 |  |
| Rib |  |  |  |  |  |  |  |  |  |  |  |  |  |  |  |  |  |  |  |  |  |
| Scapula | 9 | 9 |  |  |  |  | 1 | 1 |  | 18 | 16 |  | 8 | 8 |  | 1 | 1 |  |  |  |  |
| Vertebra | 6 | 6 |  |  |  |  |  |  |  | 6 | 6 |  | 1 | 1 |  | 3 | 2 |  |  |  |  |
| Pelvis | 10 | 8 |  |  |  |  |  |  |  | 13 | 10 |  | 3 | 3 |  | 2 | 2 |  |  |  |  |
| Flat bone |  |  |  |  |  |  |  |  |  |  |  |  |  |  |  |  |  |  |  |  |  |
| AXIAL TOTAL | 25 | 23 |  |  |  |  | 1 | 1 |  | 37 | 32 |  | 12 | 12 |  | 6 | 5 |  |  |  |  |
| Humerus | 21 | 19 |  | 3 | 3 |  | 2 | 2 |  | 44 | 36 |  | 4 | 4 |  | 3 | 3 |  |  |  |  |
| Radius | 6 | 6 |  |  |  |  | 3 | 3 |  | 66 | 54 |  | 13 | 13 |  | 4 | 3 |  |  |  |  |
| Ulna | 14 | 12 |  |  |  |  |  |  |  | 13 | 13 |  | 8 | 8 |  | 3 | 3 |  |  |  |  |
| Carpals | 6 | 6 |  |  |  |  |  |  |  | 1 | 1 |  |  |  |  | 2 | 2 |  |  |  |  |
| Metacarpus | 20 | 15 |  |  |  |  | 1 | 1 |  | 29 | 25 |  | 4 | 4 |  | 2 | 2 |  |  |  |  |
| Femur | 7 | 5 |  |  |  |  |  |  |  | 24 | 20 |  | 6 | 5 |  | 2 | 1 |  |  |  |  |
| Patella |  |  |  |  |  |  |  |  |  | 1 | 1 |  |  |  |  |  |  |  |  |  |  |
| Tibia | 17 | 15 |  | 4 | 4 |  | 1 | 1 |  | 72 | 59 |  | 6 | 6 |  | 1 | 1 |  |  |  |  |
| Fibula |  |  |  |  |  |  |  |  |  |  |  |  | 3 | 2 |  |  |  |  |  |  |  |
| Astragalus | 8 | 8 |  |  |  |  | 2 | 2 |  | 3 | 3 |  | 5 | 5 |  |  |  |  |  |  |  |
| Calcaneus | 10 | 10 |  |  |  |  |  |  |  | 6 | 6 |  | 4 | 4 |  |  |  |  |  |  |  |
| Tarsals | 3 | 3 |  |  |  |  |  |  |  | 1 | 1 |  |  |  |  |  |  |  |  |  |  |
| Metatarsus | 14 | 13 |  |  |  |  | 1 | 1 |  | 41 | 35 |  | 2 | 2 |  | 2 | 2 |  |  |  |  |
| First phalanx | 47 | 47 |  |  |  |  | 1 | 1 |  | 7 | 7 |  | 10 | 10 |  | 2 | 2 |  |  |  |  |
| Second phalanx | 19 | 19 |  |  |  |  |  |  |  | 3 | 3 |  | 3 | 3 |  | 5 | 5 |  |  |  |  |
| Third phalanx | 7 | 7 |  |  |  |  |  |  |  |  |  |  | 2 | 2 |  | 2 | 2 |  |  |  |  |
| Metapodial | 3 | 3 |  |  |  |  |  |  |  | 14 | 14 |  | 12 | 12 |  | 3 | 2 |  |  |  |  |
| Long bone |  |  |  |  |  |  |  |  |  | 1 | 1 |  | 1 | 1 |  |  |  |  |  |  |  |
| APPENDICULAR TOTAL | 202 | 188 |  | 7 | 7 |  | 11 | 11 |  | 326 | 279 |  | 83 | 81 |  | 31 | 28 |  |  |  |  |
| TOTAL | 377 | 331 |  | 36 | 36 |  | 44 | 40 |  | 696 | 612 |  | 277 | 262 |  | 58 | 54 |  | 1 | 1 |  |

|  | ***Cervus elaphus*** | | | ***Capreolus capreolus*** | | | ***Oryctolagus cuniculus*** | | | ***Lepus granatensis*** | | | **Leporidae** | | |
| --- | --- | --- | --- | --- | --- | --- | --- | --- | --- | --- | --- | --- | --- | --- | --- |
|  | **NR** | **MNE** | **MNI** | **NR** | **MNE** | **MNI** | **NR** | **MNE** | **MNI** | **NR** | **MNE** | **MNI** | **NR** | **MNE** | **MNI** |
| Skull + horn | 6 | 6 |  |  |  |  |  |  |  |  |  |  |  |  |  |
| Antler | 18 | 5 |  |  |  |  |  |  |  |  |  |  |  |  |  |
| Mandible | 15 | 11 |  | 1 | 1 |  | 1 | 1 |  |  |  |  | 1 | 1 |  |
| Maxilla | 6 | 6 |  |  |  |  |  |  |  |  |  |  | 1 | 1 |  |
| Tooth | 30 | 30 |  |  |  |  |  |  |  |  |  |  | 1 | 1 |  |
| Maxilla tooth |  |  |  |  |  |  |  |  |  |  |  |  |  |  |  |
| CRANIAL TOTAL | 75 | 58 |  | 1 | 1 |  | 1 | 1 |  |  |  |  | 3 | 3 |  |
| Rib |  |  |  |  |  |  |  |  |  |  |  |  |  |  |  |
| Scapula | 6 | 6 |  |  |  |  | 2 | 2 |  |  |  |  | 2 | 2 |  |
| Vertebra |  |  |  |  |  |  |  |  |  |  |  |  | 7 | 7 |  |
| Pelvis | 6 | 5 |  |  |  |  | 3 | 3 |  |  |  |  | 5 | 5 |  |
| Flat bone |  |  |  |  |  |  |  |  |  |  |  |  |  |  |  |
| AXIAL TOTAL | 12 | 11 |  |  |  |  | 5 | 5 |  |  |  |  | 14 | 14 |  |
| Humerus | 10 | 9 |  |  |  |  | 1 | 1 |  |  |  |  | 9 | 9 |  |
| Radius | 11 | 11 |  |  |  |  |  |  |  |  |  |  | 5 | 5 |  |
| Ulna | 7 | 6 |  |  |  |  |  |  |  |  |  |  | 2 | 2 |  |
| Carpals | 2 | 2 |  |  |  |  |  |  |  |  |  |  |  |  |  |
| Metacarpus | 13 | 9 |  |  |  |  |  |  |  |  |  |  |  |  |  |
| Femur | 6 | 6 |  |  |  |  |  |  |  |  |  |  | 3 | 3 |  |
| Patella |  |  |  |  |  |  |  |  |  |  |  |  |  |  |  |
| Tibia | 22 | 17 |  |  |  |  | 1 | 1 |  | 1 | 1 |  | 2 | 2 |  |
| Fibula |  |  |  |  |  |  |  |  |  |  |  |  |  |  |  |
| Astragalus | 9 | 9 |  |  |  |  |  |  |  |  |  |  |  |  |  |
| Calcaneus | 4 | 4 |  |  |  |  |  |  |  |  |  |  | 1 | 1 |  |
| Tarsals |  |  |  |  |  |  |  |  |  |  |  |  |  |  |  |
| Metatarsus | 12 | 10 |  |  |  |  |  |  |  |  |  |  | 1 | 1 |  |
| First phalanx | 5 | 5 |  |  |  |  |  |  |  |  |  |  |  |  |  |
| Second phalanx | 8 | 8 |  |  |  |  |  |  |  |  |  |  |  |  |  |
| Third phalanx | 1 | 1 |  |  |  |  |  |  |  |  |  |  |  |  |  |
| Metapodial | 15 | 11 |  |  |  |  |  |  |  |  |  |  | 1 | 1 |  |
| Long bone |  |  |  |  |  |  |  |  |  |  |  |  |  |  |  |
| APPENDICULAR TOTAL | 125 | 108 |  |  |  |  | 2 | 2 |  | 1 | 1 |  | 24 | 24 |  |
| TOTAL | 212 | 177 |  | 1 | 1 |  | 8 | 8 |  | 1 | 1 |  | 41 | 41 |  |

Table 1 Representation of skeletal profiles

| **Taxon** | **Pits** | | | | | **Punctures** | | | | | **Scores** | | | | | **Furrowing** | | | | | **Crenulated edges** | | | | | |
| --- | --- | --- | --- | --- | --- | --- | --- | --- | --- | --- | --- | --- | --- | --- | --- | --- | --- | --- | --- | --- | --- | --- | --- | --- | --- | --- |
| **1** | **2** | **3** | **4** | **5** | **1** | **2** | **3** | **4** | **5** | **1** | **2** | **3** | **4** | **5** | **1** | **2** | **3** | **4** | **5** | **1** | **2** | **3** | **4** | **5** |
| *Bos taurus* | 33 | 53 | 31 | 20 | 5 | 19 | 6 | 6 | 2 | - | 31 | 20 | 20 | 2 | 5 | 8 | 20 | 8 | 2 | 5 | - | 8 | 2 | 3 | - |
| Caprinae | 88 | 97 | 64 | 23 | - | 16 | 5 | 3 | - | - | 60 | 53 | 13 | 3 | - | 39 | 44 | 20 | 9 | 9 | 14 | 13 | 5 | 3 | 3 |
| *Sus* sp. | 11 | 8 | 14 | 11 | 2 | 6 | 3 | 2 | - | - | 6 | 6 | 6 | - | - | 3 | 8 | 6 | 5 | - | - | 2 | 2 | 2 | 2 |
| *Equus* sp. | 3 | 6 | 8 | 3 | 3 | 3 | 2 | 2 | - | - | 8 | 5 | 6 | - | 2 | - | 2 | - | 2 | 8 | - | 3 | - | - | - |
| *Cervus elaphus* | 22 | 25 | 16 | 13 | - | 5 | 5 | 2 | 2 | - | 31 | 13 | 5 | 5 | 2 | 8 | 13 | 3 | 3 | 2 | - | 3 | - | 2 | - |
| Leporidae | - | 2 | 2 | - | - | - | - | - | - | - | - | - | 2 | - | - | - | - | - | - | - | - | 2 | - | - | - |
| Large mammal | 92 | 116 | 81 | 42 | 11 | 19 | 25 | 11 | 5 | 2 | 67 | 56 | 28 | 6 | - | 11 | 23 | 19 | 19 | 6 | 17 | 22 | 30 | 11 | 5 |
| Medium mammal | 55 | 70 | 38 | 17 | 6 | 8 | 2 | 6 | 2 | - | 34 | 19 | 9 | 3 | - | 8 | 8 | 13 | 8 | 6 | 13 | 11 | 11 | - | - |
| Small mammal | 133 | 110 | 50 | 20 | 5 | 8 | 9 | 6 | - | - | 52 | 44 | 17 | - | - | 27 | 25 | 9 | 11 | 3 | 20 | 17 | 11 | 5 | 5 |

Table 2 Number of remains affected by carnivore activity. 1: 20% of the surface; 2: 40% of the surface; 3: 60% of the surface; 4: 80% of the surface; 5: 100% of the surface

| **Taxon** | **Weathering** | | | | | **Concretion** | | | | | **Root marks** | | | | | **Manganese** | | | | |
| --- | --- | --- | --- | --- | --- | --- | --- | --- | --- | --- | --- | --- | --- | --- | --- | --- | --- | --- | --- | --- |
| **1** | **2** | **3** | **4** | **5** | **1** | **2** | **3** | **4** | **5** | **1** | **2** | **3** | **4** | **5** | **1** | **2** | **3** | **4** | **5** |
| *Bos taurus* | 6 | 2 | - | 2 | - | 60 | 34 | 17 | 20 | 9 | 67 | 34 | 20 | 5 | - | 28 | 47 | 91 | 44 | 49 |
| Caprinae | 6 | 2 | 2 | - | - | 124 | 78 | 36 | 9 | 11 | 149 | 53 | 16 | 3 | - | 103 | 117 | 177 | 70 | 60 |
| *Sus* sp. | - | 13 | 3 | - | - | 17 | 16 | 13 | 5 | 5 | 34 | 8 | 3 | 2 | - | 25 | 23 | 45 | 6 | 23 |
| *Equus* sp. | - | - | - | 2 | - | 6 | 6 | 3 | 3 | 2 | 13 | 6 | 2 | 3 | - | - | 9 | 13 | 5 | 9 |
| Canidae | - | - | - | - | 2 | - | - | - | - | - | - | - | - | - | - | - | 1 | - | - | - |
| *Cervus elaphus* | 6 | 3 | - | - | - | 39 | 16 | 14 | 3 | - | 52 | 17 | 3 | - | - | 23 | 30 | 52 | 31 | 20 |
| Leporidae | - | - | - | - | - | 14 | 3 | 2 | 2 | - | 19 | 2 | - | - | - | 9 | 14 | 14 | 6 | 6 |
| Large mammal | 16 | 17 | 6 | 2 | - | 183 | 114 | 67 | 28 | 11 | 211 | 67 | 28 | 3 | - | 69 | 139 | 218 | 124 | 125 |
| Medium mammal | 8 | 11 | 9 | - | - | 94 | 74 | 30 | 19 | 8 | 122 | 34 | 6 | 3 | - | 47 | 77 | 138 | 94 | 61 |
| Small mammal | 19 | 22 | 16 | - | - | 211 | 88 | 72 | 28 | 20 | 215 | 63 | 13 | 5 | - | 143 | 171 | 190 | 136 | 147 |
| Very small mammal | - | - | - | - | - | 2 | 2 | 2 | - | - | 5 | - | - | - | - | - | 3 | 3 | 2 | 5 |

Table 3 Number of remains affected by fossil-diagenetic processes. 1: 20% of the surface; 2: 40% of the surface; 3: 60% of the surface; 4: 80% of the surface; 5: 100% of the surface
